# Supplementary material for: Highly-accurate long-read sequencing improves variant detection and assembly of a human genome
Source: bioRxiv or medRxiv preprint supplement (doi:10.1101/519025), 2019-01-23
Supplement: Supplementary file [file media-1.pdf]

## Supplementary Material

# Highly-accurate long-read sequencing improves variant detection and assembly of a human genome

## Authors

Aaron M. Wenger<sup>1\*</sup>, Paul Peluso<sup>1\*</sup>, William J. Rowell<sup>1</sup>, Pi-Chuan Chang<sup>2</sup>, Richard J. Hall<sup>1</sup>, Gregory T. Concepcion<sup>1</sup>, Jana Ebler<sup>3,4,5</sup>, Arkarachai Fungtammasan<sup>6</sup>, Alexey Kolesnikov<sup>2</sup>, Nathan D. Olson<sup>7</sup>, Armin Töpfer<sup>1</sup>, Chen-Shan Chin<sup>6</sup>, Michael Alonge<sup>8</sup>, Medhat Mahmoud<sup>9</sup>, Yufeng Qian<sup>1</sup>, Adam M. Phillippy<sup>10</sup>, Michael C. Schatz<sup>8</sup>, Gene Myers<sup>11</sup>, Mark A. DePristo<sup>2</sup>, Jue Ruan<sup>12</sup>, Tobias Marschall<sup>3,4</sup>, Fritz J. Sedlazeck<sup>9</sup>, Justin M. Zook<sup>7</sup>, Heng Li<sup>13</sup>, Sergey Koren<sup>10</sup>, Andrew Carroll<sup>2</sup>, David R. Rank<sup>1†</sup>, Michael W. Hunkapiller<sup>1†</sup>

\* These authors contributed equally to this work.

† Address correspondence to M.W.H. ([mhunkapiller@pacb.com](mailto:mhunkapiller@pacb.com)) or D.R.R. ([drank@pacb.com](mailto:drank@pacb.com)).

1. Pacific Biosciences, Menlo Park, CA, USA
2. Google Inc., Mountain View, CA, USA
3. Center for Bioinformatics, Saarland University, Saarbrücken, Germany
4. Max Planck Institute for Informatics, Saarland Informatics Campus E1.4, Saarbrücken, Germany
5. Graduate School of Computer Science, Saarland University, Saarland Informatics Campus E1.3, Saarbrücken, Germany
6. DNAnexus, Mountain View, CA, USA
7. National Institute of Standards and Technology, Gaithersburg, MD, USA
8. Department of Computer Science, Johns Hopkins University, Baltimore, MD, USA
9. Human Genome Sequencing Center, Baylor College of Medicine, Houston, TX, USA
10. Genome Informatics Section, Computational and Statistical Genomics Branch, National Human Genome Research Institute, Bethesda, MD, USA
11. Max Planck Institute of Molecular Cell Biology and Genetics, Dresden, Germany
12. Agricultural Genomics Institute, Chinese Academy of Agriculture Sciences, Shenzhen, China
13. Dana-Farber Cancer Institute, Boston, MA, USA

## Detailed Author Contributions

CCS Library Preparation and Sequencing: DRR, PP, YQ

Quality Evaluation of CCS Reads: AMW, GM, RJH

Increased Mappability of CCS Reads: RJH

Small Variant Detection in CCS Reads: AC, AK, CSC, FJS, JMZ, MAD, NDO, PC, WJR

Phasing Small Variants: JE, TM, WJR

Improving Small Variant Detection with Haplotype Phasing: AC, AK, MAD, PC, WJR

Structural Variant Detection in CCS Reads: AMW, AT, FJS, HL, MCS, MA, MM

De Novo Assembly of CCS Reads: AF, AMP, AMW, DRR, JR, GTC, SK

Coverage Requirements for Variant Calling and De Novo Assembly: AC, AK, AMW, GTC, JE, TM, WJR

Revising and Expanding Genome in a Bottle Benchmarks: AMW, JMZ, NDO

## Supplementary Figures

### Supplementary Figure 1

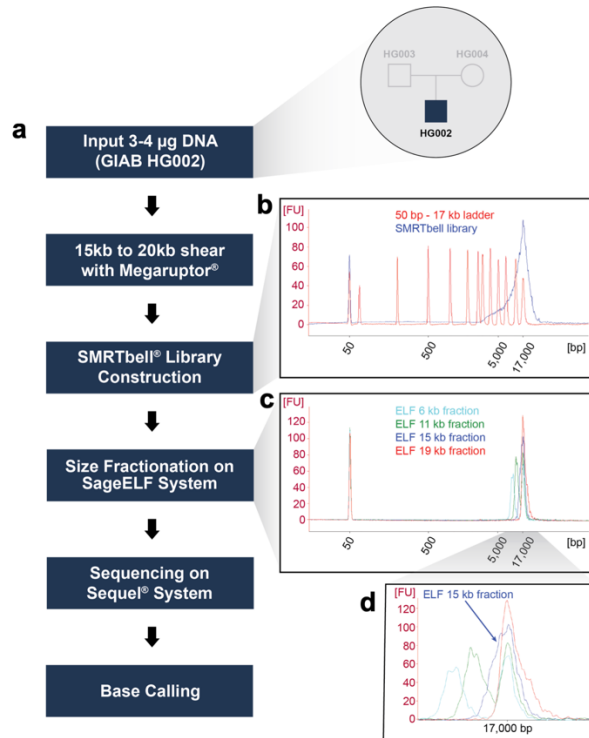

**Supplementary Figure 1. CCS protocol.** (a) Sample preparation and sequencing workflow. (b) BioAnalyzer trace for the SMRTbell library, sheared to target 15-20 kb fragments. “FU” is fluorescence units. (c) BioAnalyzer trace for ELF fractions of the SMRTbell library. (d) The fraction centered around 15 kb was used for sequencing.

## Supplementary Figure 2

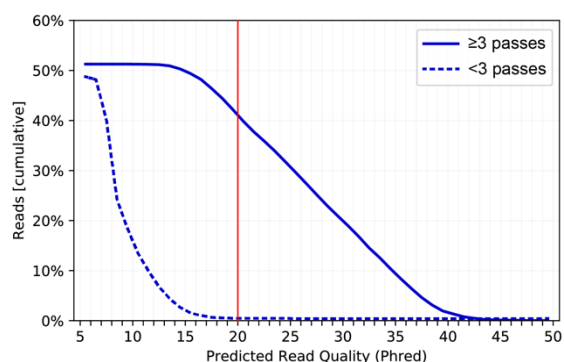

**Supplementary Figure 2. Relationship between predicted CCS read quality and number of passes.** Distribution of predicted quality for reads with fewer than 3 passes and at least 3 passes, which we consider a minimum pass count for CCS. Approximately half of reads have 3 or more passes; among those nearly all achieve Q20 predicted accuracy.

## Supplementary Figure 3

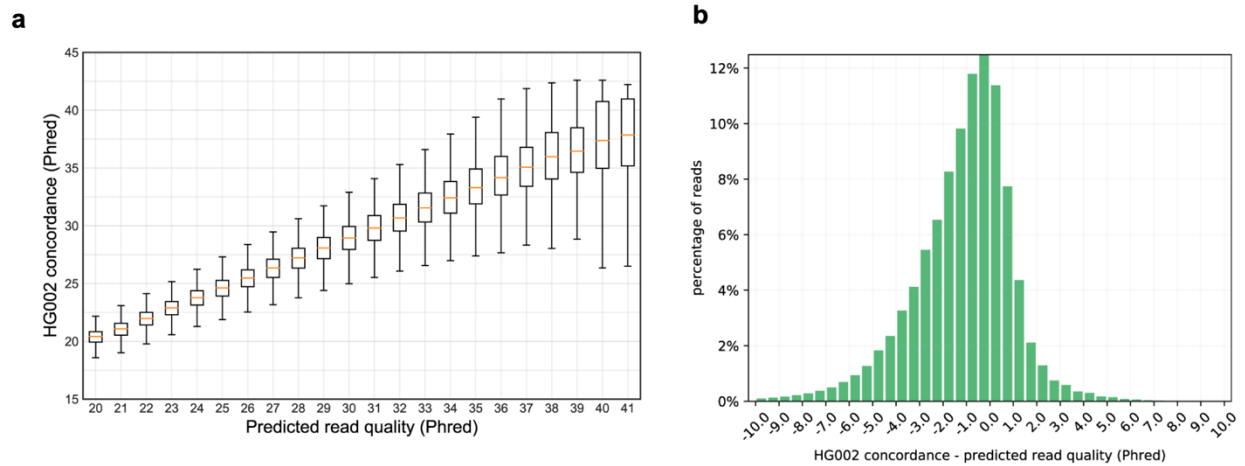

**Supplementary Figure 3. Agreement between empirical concordance and predicted read quality for CCS reads.** Empirical concordance is measured from alignments to GRCh37 at HG002 Genome in a Bottle high-confidence, non-variant positions. Predicted read quality is output by the CCS algorithm. (a) Distribution of HG002 concordance at levels of predicted read quality ( $R^2$  of median = 0.9994), and (b) difference between concordance and predicted read quality show that the predicted read quality is well-calibrated to the empirical read quality.

Supplementary Figure 4

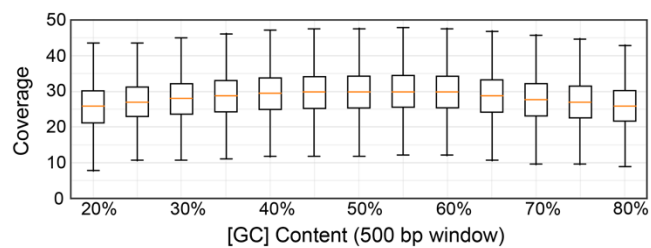

**Supplementary Figure 4. Coverage as a function of genome [GC] content.** Average coverage from 89 Gb of total yield, measured in 500 bp windows.

## Supplementary Figure 5

**a** GRCh37 chr6:29,909,247-29,914,661

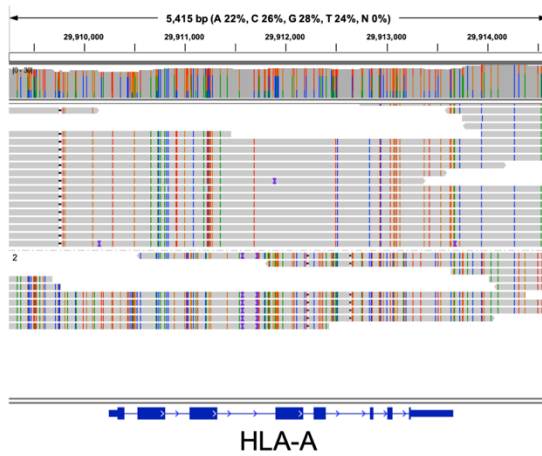

A\*01:01:01:01  
A\*26:01:01:01

**b** GRCh37 chr6:33,029,951-33,050,002

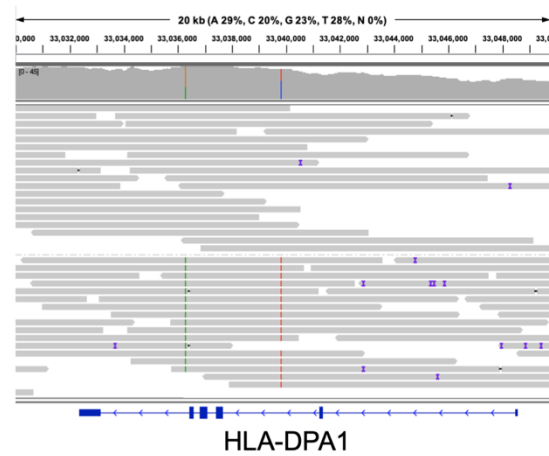

DPA1\*01:03:01:02  
DPA1\*01:03:01:04

**Supplementary Figure 5. CCS read pileups at HLA genes.** The 13.5 kb CCS reads provide phasing and full four-field resolution of HLA class I and II genes<sup>1</sup>, including (a) *HLA-A* for which HG002 has alleles that differ in the first field, and (b) *HLA-DPA1* for which HG002 has alleles that differ only in the fourth field from two intronic single nucleotide polymorphisms across 20 kb.

## Supplementary Figure 6

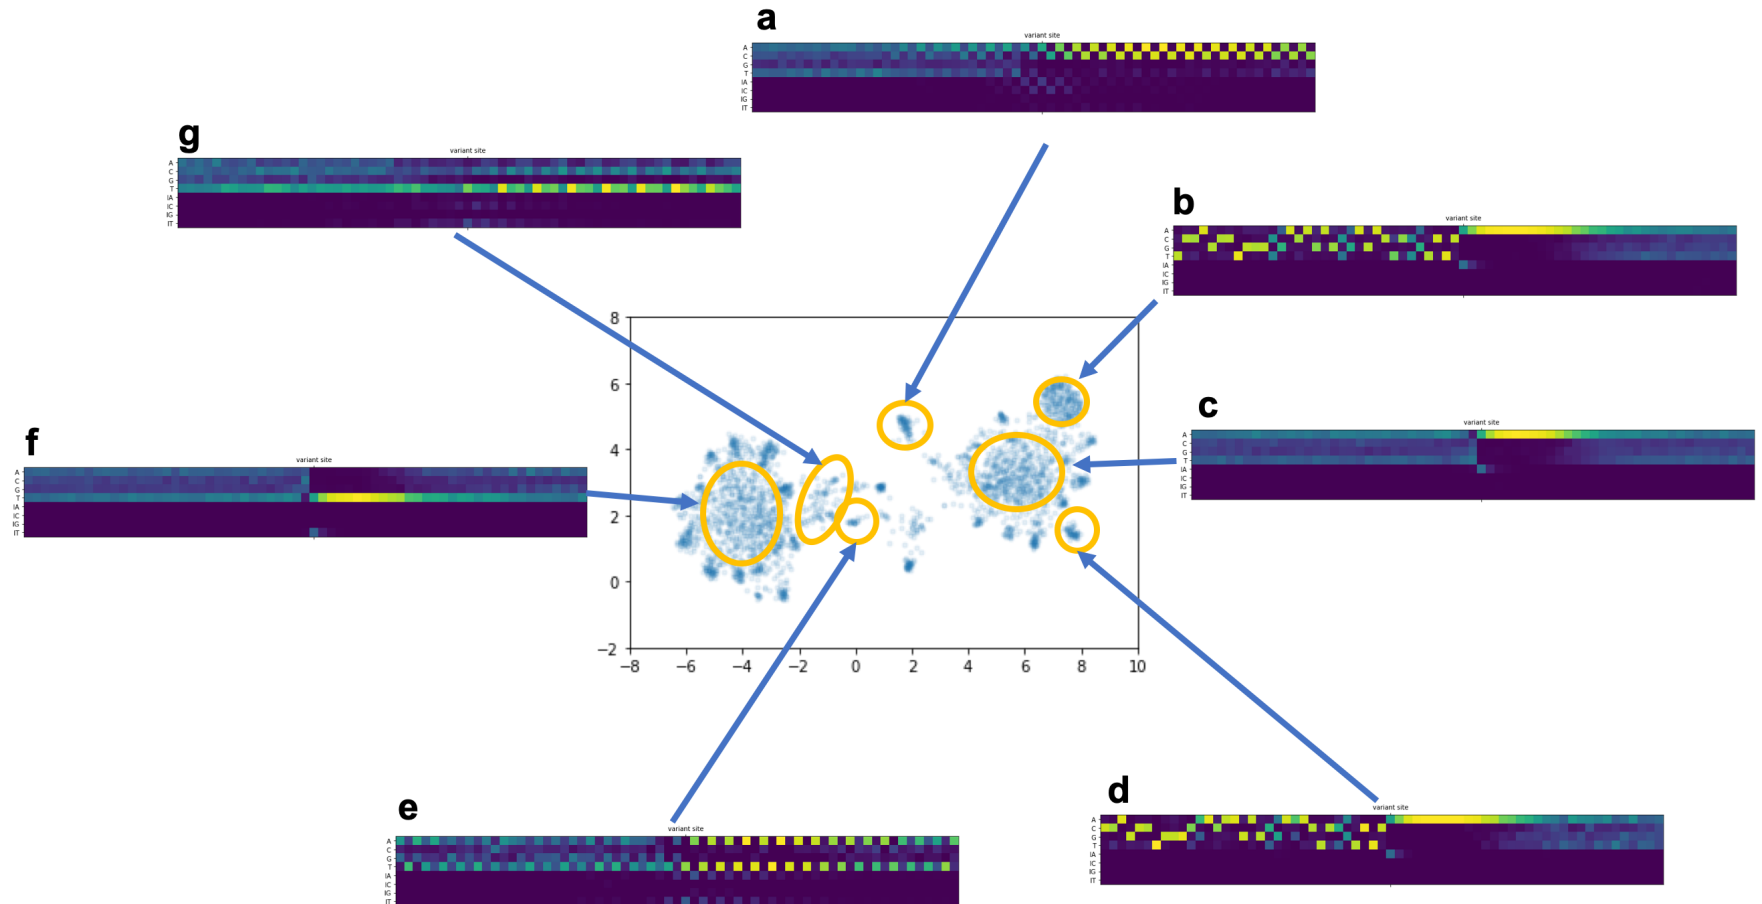

**Supplementary Figure 6. Alignment contexts around DeepVariant (CCS) discordances.** For all positions where the DeepVariant (CCS) callset is discordant with the Genome in a Bottle benchmark, CCS read alignments to the position  $\pm 32$  bp were encoded as a matrix (4 rows for A/C/G/T match, 4 rows for A/C/G/T insertion). The matrices were deflated into vectors with length  $65 \times 8 = 520$  and embedded into two dimensions using UMAP<sup>2</sup>. Some distinct clusters represent simple, identifiable patterns: (a)(e) di-nucleotide repeats; (b)(d) poly-A tails of ALU elements<sup>3</sup>; (c)(f) homopolymer A/T runs without a specific prefix; and (g) [CT]-rich simple repeats.



## Supplementary Figure 7

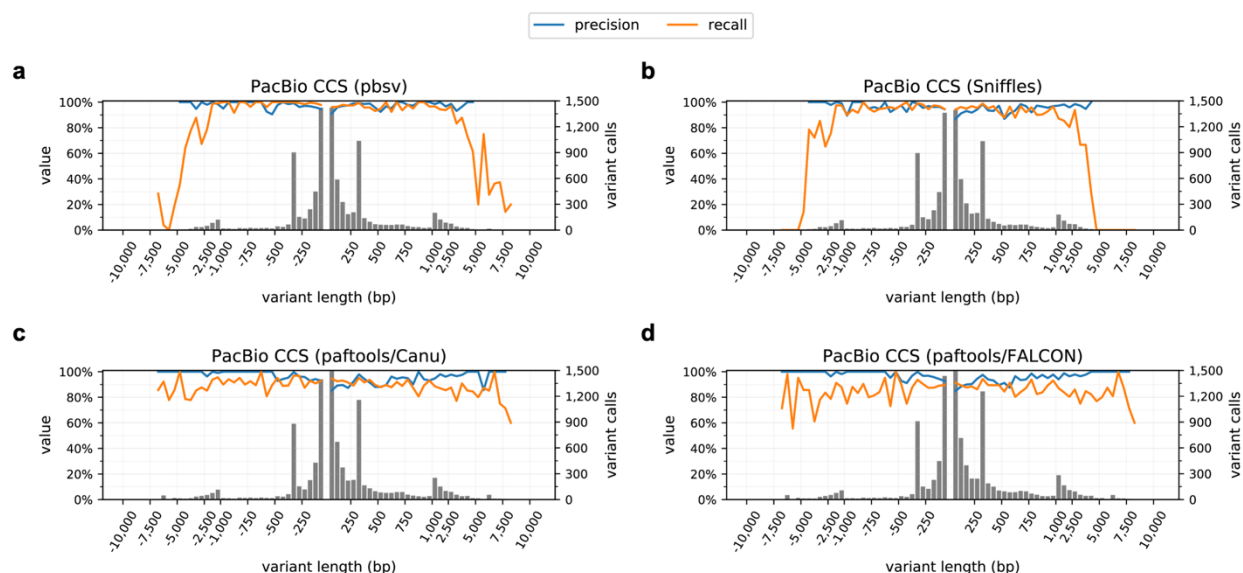

**Supplementary Figure 7. Structural variant calling performance for mapping and assembly-based callers with PacBio CCS reads.** Precision, recall, and number of variant calls in the GIAB HG002 SV high-confidence regions for PacBio CCS reads analyzed with the mapping-based variant callers (a) pbsv and (b) Sniffles and the assembly-based callers (c) paftools/Canu (polished) and (d) paftools/FALCON (unpolished). Negative length indicates a deletion; positive length indicates an insertion. The histogram bin size is 50 bp for variants shorter than 1 kb, and 500 bp for variants >1 kb. Precision and recall are measured with Truvari against the GIAB HG002 SV benchmark in high-confidence regions.

## Supplementary Figure 8

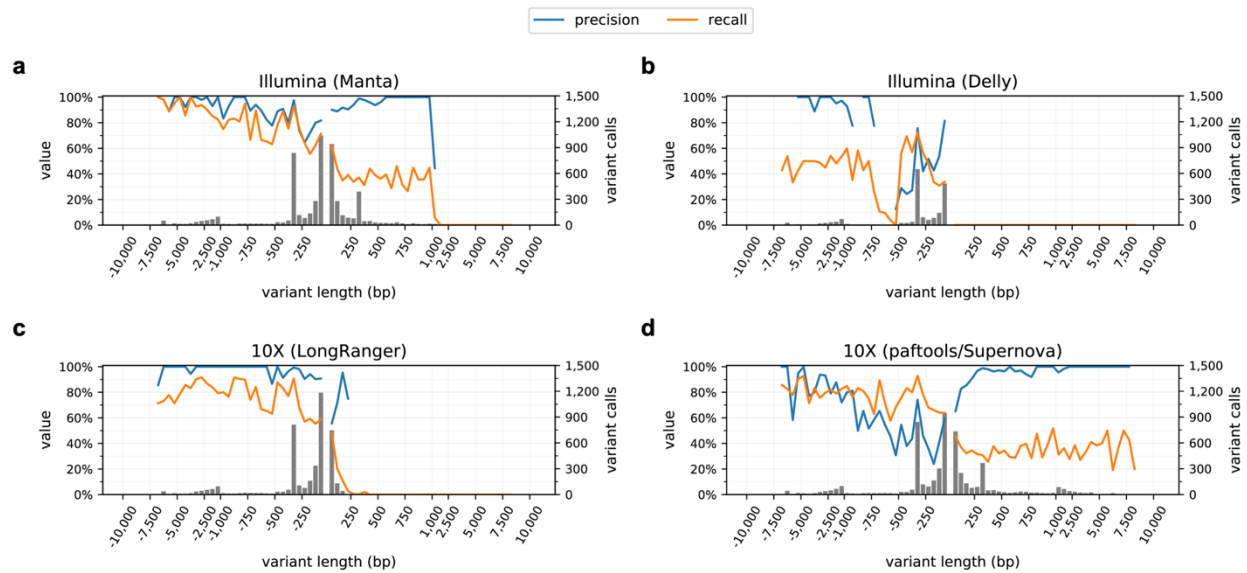

**Supplementary Figure 8. Structural variant calling performance for Illumina and 10X Genomics variant callers.** Precision, recall, and number of variant calls in the GIAB HG002 SV high-confidence regions for the Illumina short-read callers (a) Manta and (b) Delly and the 10X Genomics callers (c) LongRanger and (d) paftools/Supernova. Negative length indicates a deletion; positive length indicates an insertion. The histogram bin size is 50 bp for variants shorter than 1 kb, and 500 bp for variants >1 kb. Precision and recall are measured with Truvari against the GIAB HG002 SV benchmark in high-confidence regions.

# Supplementary Figure 9

**a** GRCh37 chr4:188,889,340-188,936,541

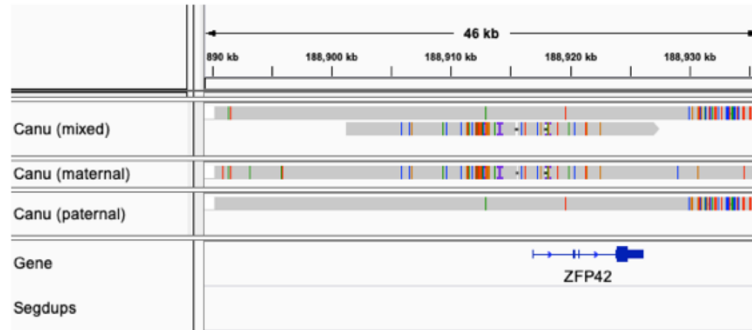

**b** GRCh37 chr9:113,990,920-114,040,367

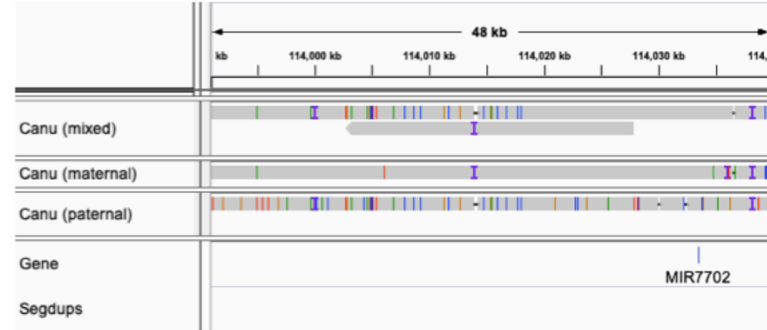

**c** GRCh37 chr20:56,503,447-56,547,584

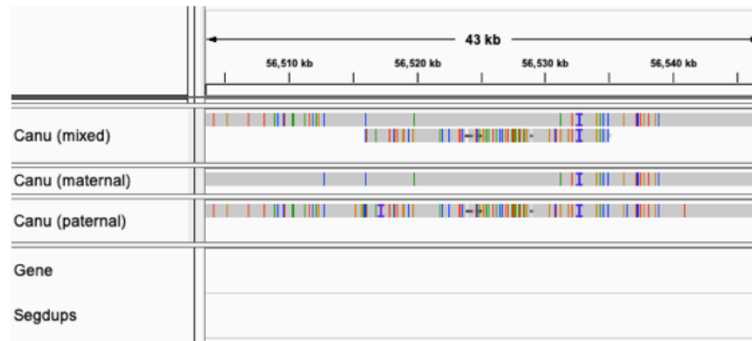

**d** GRCh37 chr11:42,136,397-42,180,563

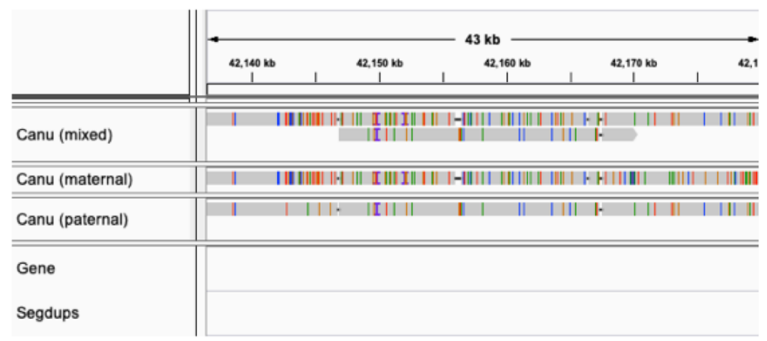

**Supplementary Figure 9. Haplotype resolution in the Canu mixed assembly.** The Canu mixed assembly is larger than the haploid human genome size because it resolves some heterozygous loci into separate maternal and paternal haplotypes. (a) (b) Loci where the long primary contig matches the paternal haplotype and a smaller contig matches the maternal haplotype. (c) (d) Similar loci where the long primary contig matches the maternal haplotype and a smaller contig matches the paternal haplotype.

## Supplementary Figure 10

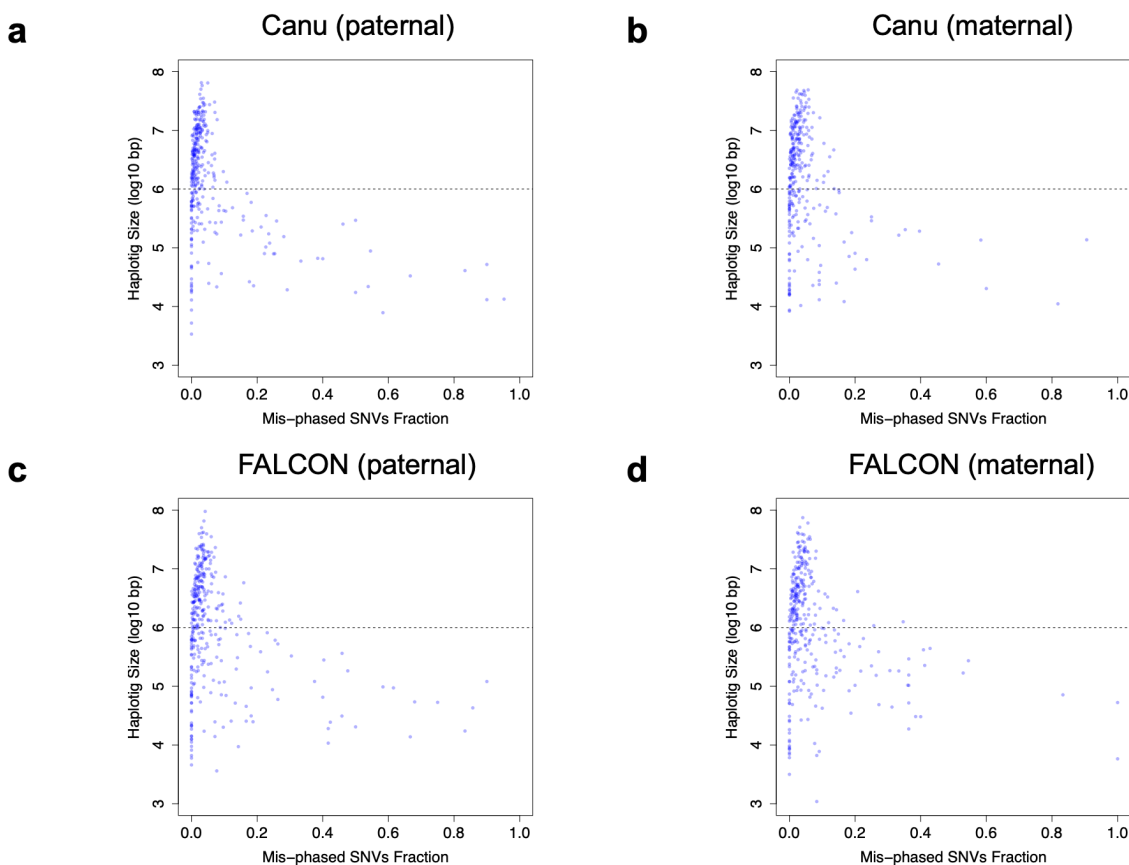

**Supplementary Figure 10. Mis-phasing analysis of parental assemblies.** Parent-specific heterozygous SNVs were identified in the Genome in a Bottle phased high-confidence callset. The “mis-phased SNVs fraction” is the fraction of parent-specific SNVs from the wrong parent (e.g.  $[\text{SNV}_{\text{pat}}]/[\text{SNV}_{\text{pat}} + \text{SNV}_{\text{mat}}]$  in a maternal contig). No large contigs have a high mis-phased SNVs ratio, which suggests proper phasing of the (a) Canu paternal, (b) Canu maternal, (c) FALCON paternal, and (d) FALCON maternal assemblies.

## Supplementary Figure 11

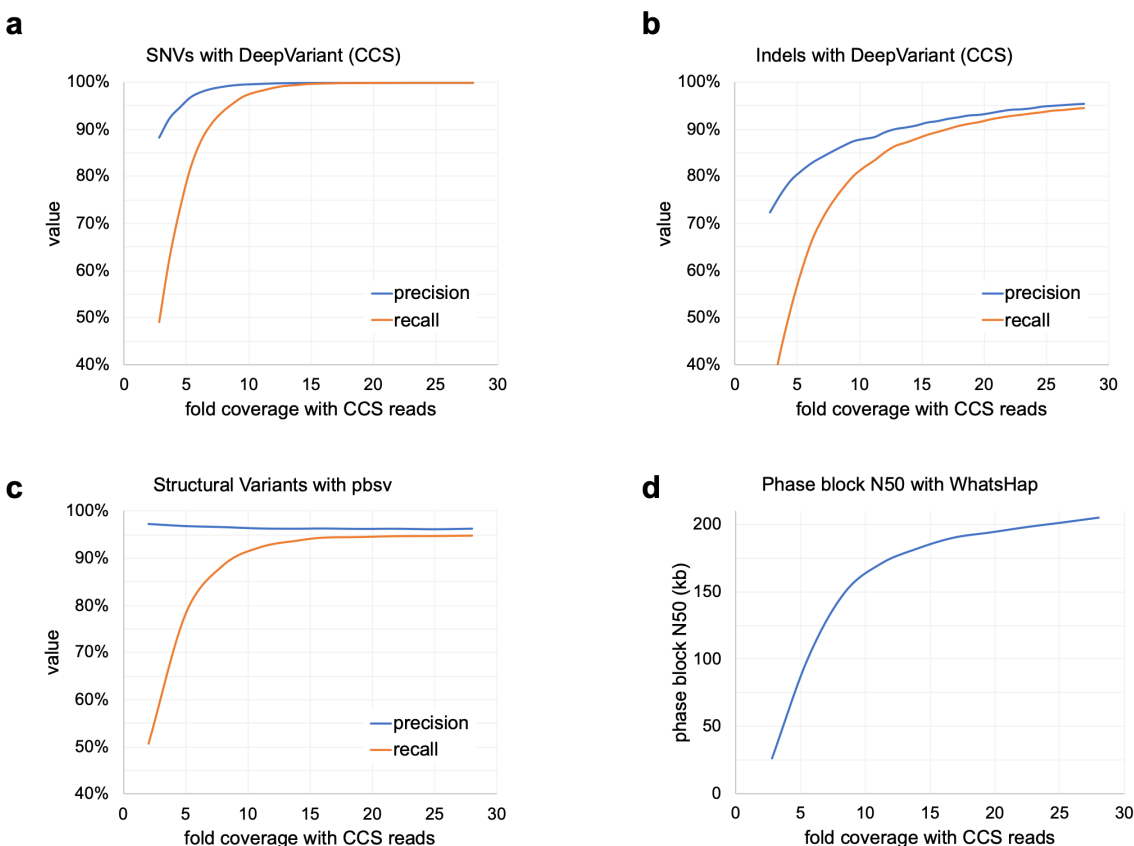

### Supplementary Figure 11. Coverage titration for variant calling and phasing.

Alignments of the 13.5 kb CCS reads were subsampled from 28-fold total coverage to evaluate variant calling and phasing performance at different coverage levels. Precision and recall for (a) SNVs and (b) indels called with DeepVariant (CCS), subsampling in steps of 3%. (c) Precision and recall for structural variants called with pbsv, subsampling in steps of 10%. (d) Phase block N50 for phasing of the 28-fold DeepVariant (CCS) callset with WhatsHap, subsampling in steps of 10%. Phasing performance is similar with a callset produced at matched coverage (not shown).

## Supplementary Figure 12

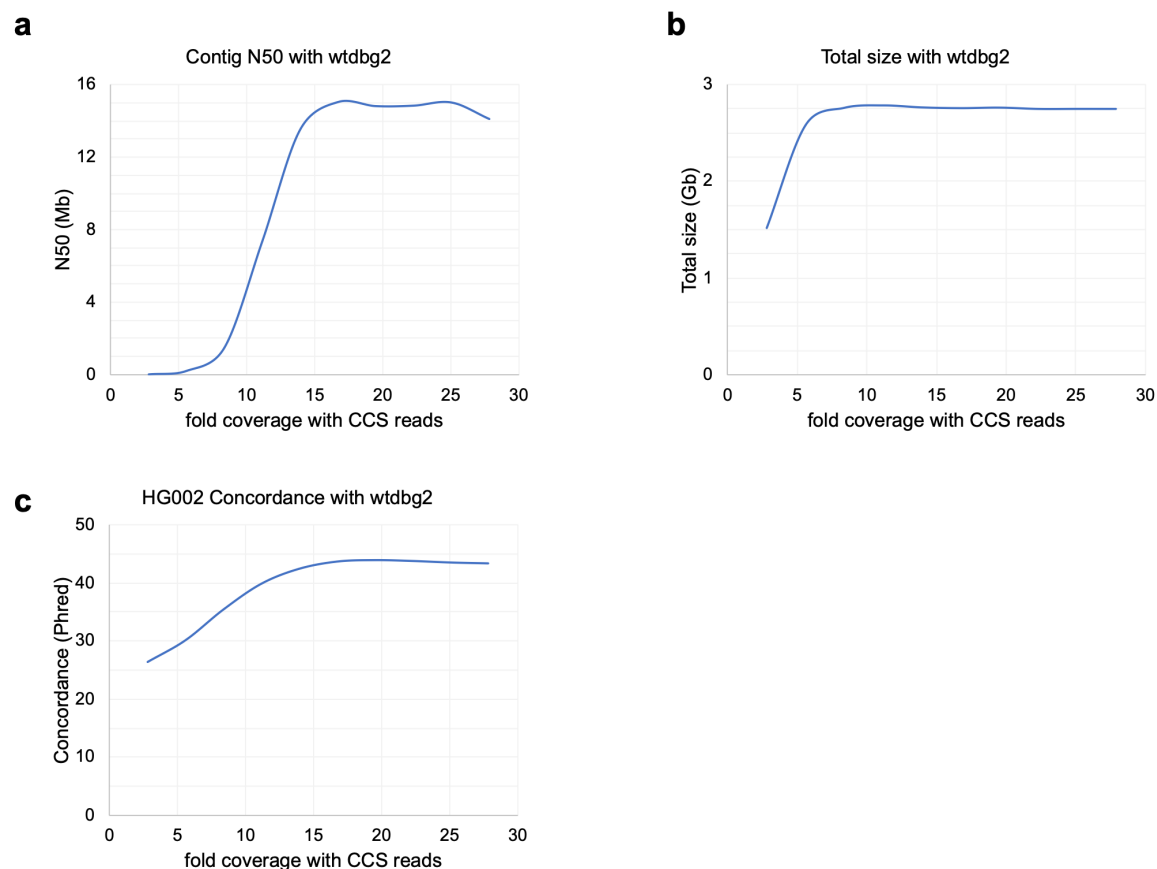

**Supplementary Figure 12. Coverage titration for *de novo* assembly.** The 13.5 kb CCS reads were subsampled from 28-fold total coverage in steps of 10% to evaluate *de novo* assembly at different coverage levels. Reads were assembled with wtdbg2. (a) Contiguity measured as contig N50. (b) Completeness measured as total assembly size. (c) Correctness measured as concordance to HG002 at high-confidence, non-variant positions.

## Supplementary Figure 13

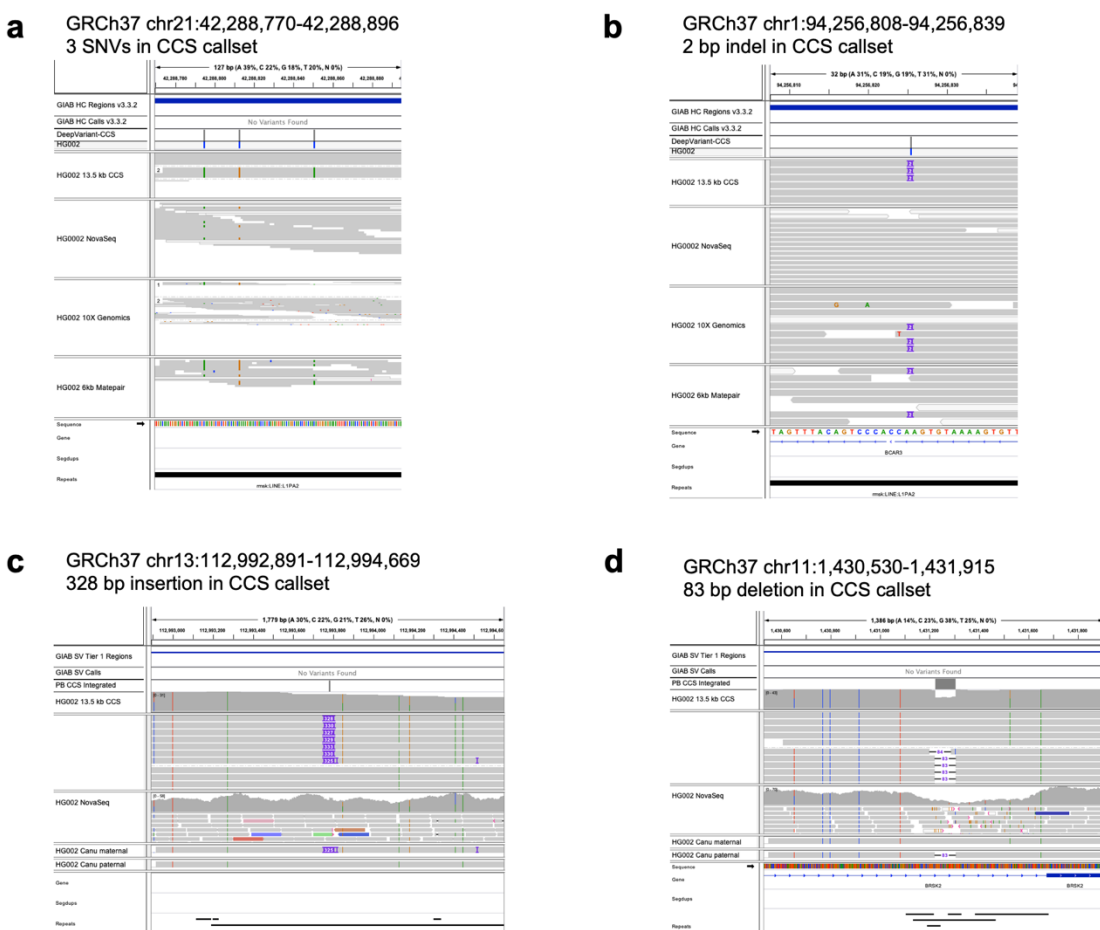

**Supplementary Figure 13. Likely errors in the Genome in a Bottle benchmark identified by CCS callsets.** The high-quality Genome in a Bottle benchmark and CCS variant callsets have strong, but not perfect, concordance. Manual curation of discrepancies identifies benchmark errors for all variant types that are correctable using the CCS variant callsets. Shown are four loci that the Genome in a Bottle benchmark records as homozygous reference where CCS reads identify likely heterozygous variation: (a) Three SNVs supported by CCS reads and 6 kb matepair reads. (b) A 2 bp insertion supported by CCS reads, 10X Genomics reads, and 6 kb matepair reads. (c) A 328 bp insertion supported by CCS reads and assemblies. (d) An 83 bp insertion supported by CCS reads.

## Supplementary Tables

Supplementary Table 1

| Discordance               | Total across CCS reads |             | Frequency (1 / bp) | Concordance (Phred) |              |
|---------------------------|------------------------|-------------|--------------------|---------------------|--------------|
|                           | Count                  | Percentage  |                    |                     |              |
| Mismatch                  | 5,399,441              | 3.4%        | 13,048             | 99.992%             | (Q41)        |
| Non-homopolymer indel     | 7,286,391              | 4.6%        | 9,669              | 99.990%             | (Q39)        |
| Non-homopolymer insertion | 5,700,531              | 3.6%        | 12,359             | 99.991%             | (Q41)        |
| Non-homopolymer deletion  | 1,585,860              | 1.0%        | 44,425             | 99.998%             | (Q46)        |
| Homopolymer indel         | 147,629,196            | 92.0%       | 477                | 99.790%             | (Q27)        |
| Homopolymer insertion     | 67,916,571             | 42.3%       | 1,037              | 99.903%             | (Q30)        |
| Homopolymer deletion      | 79,712,625             | 49.7%       | 884                | 99.887%             | (Q29)        |
| <b>Total</b>              | <b>160,315,028</b>     | <b>100%</b> | <b>439</b>         | <b>99.772%</b>      | <b>(Q26)</b> |

**Supplementary Table 1. Discordances between CCS read alignments and HG002 at high-confidence, non-variant positions.** An indel is considered a homopolymer event if the inserted/deleted basepairs match either the preceding or following reference basepair. “Count” is the total number of discordances across CCS reads. “Percentage” is over all discordances, by type. “Concordance (Phred)” considers only discordances of the given type. A large majority of discordances between the CCS reads and HG002 are homopolymer indels, which likely represent indel errors in the CCS reads.



Supplementary Table 2

| Platform           | Coverage | Variant caller (training model)          | SNVs                  |                       |                       | Indels                |                       |                       |
|--------------------|----------|------------------------------------------|-----------------------|-----------------------|-----------------------|-----------------------|-----------------------|-----------------------|
|                    |          |                                          | Precision             | Recall                | F1 ^                  | Precision             | Recall                | F1                    |
| Illumina (Novaseq) | 30-fold  | DeepVariant (Illumina model)             | <b><u>99.925%</u></b> | <b><u>99.940%</u></b> | <b><u>99.933%</u></b> | <b><u>99.450%</u></b> | <b><u>99.233%</u></b> | <b><u>99.341%</u></b> |
| Illumina (Novaseq) | 30-fold  | GATK HaplotypeCaller (no filter)         | 99.824%               | 99.920%               | 99.872%               | 99.230%               | 98.898%               | 99.064%               |
| PacBio (CCS)       | 28-fold  | DeepVariant (haplotype-sorted CCS model) | 99.778%               | <b><u>99.937%</u></b> | 99.858%               | 96.860%               | 96.035%               | 96.446%               |
| PacBio (CCS)       | 28-fold  | DeepVariant (CCS model)                  | 99.807%               | 99.904%               | 99.855%               | 95.387%               | 94.501%               | 94.942%               |
| PacBio (CCS)       | 28-fold  | DeepVariant (Illumina model)             | 99.533%               | 99.793%               | 99.663%               | 23.991%               | 81.692%               | 37.090%               |
| PacBio (CCS)       | 28-fold  | GATK HaplotypeCaller (hard filter)       | 99.408%               | 99.531%               | 99.469%               | 77.137%               | 79.941%               | 78.514%               |

**Supplementary Table 2. Performance of small variant calling with CCS reads on chromosome 20.** DeepVariant models were not presented with chromosome 20 data before variant calling, so accuracy evaluations between GATK and DeepVariant are most comparable for chromosome 20. **Bold** indicates the highest value in each column. Underline indicates a value higher than the GATK HaplotypeCaller run on 30-fold Illumina NovaSeq reads. Callers are sorted (“^”) based on F1 for SNVs.

Supplementary Table 3

| GRCh37<br>chrom  | Heterozygous<br>variants | % phased      | Phase<br>blocks | Phase block<br>N50 (bp) | Hamming<br>error rate | Switch<br>errors | Switch<br>error rate |
|------------------|--------------------------|---------------|-----------------|-------------------------|-----------------------|------------------|----------------------|
| 1                | 220,180                  | 99.61%        | 1,585           | 225,534                 | 1.53%                 | 1,168            | 0.65%                |
| 2                | 212,809                  | 99.62%        | 1,879           | 179,190                 | 1.53%                 | 373              | 0.21%                |
| 3                | 193,762                  | 99.73%        | 1,312           | 259,761                 | 1.63%                 | 408              | 0.25%                |
| 4                | 199,451                  | 99.70%        | 1,338           | 238,088                 | 1.65%                 | 547              | 0.33%                |
| 5                | 186,023                  | 99.75%        | 1,115           | 277,697                 | 1.06%                 | 237              | 0.15%                |
| 6                | 177,458                  | 99.71%        | 1,160           | 265,656                 | 0.96%                 | 303              | 0.20%                |
| 7                | 166,051                  | 99.70%        | 1,048           | 246,748                 | 2.23%                 | 1,105            | 0.80%                |
| 8                | 153,941                  | 99.71%        | 1,002           | 250,705                 | 1.22%                 | 322              | 0.25%                |
| 9                | 119,897                  | 99.72%        | 778             | 207,951                 | 1.30%                 | 362              | 0.36%                |
| 10               | 141,433                  | 99.72%        | 840             | 255,026                 | 2.13%                 | 344              | 0.29%                |
| 11               | 128,503                  | 99.67%        | 948             | 203,073                 | 1.24%                 | 169              | 0.16%                |
| 12               | 135,470                  | 99.72%        | 832             | 292,306                 | 3.51%                 | 229              | 0.20%                |
| 13               | 100,628                  | 99.69%        | 638             | 244,289                 | 2.19%                 | 123              | 0.14%                |
| 14               | 93,645                   | 99.68%        | 548             | 292,617                 | 2.70%                 | 520              | 0.66%                |
| 15               | 81,981                   | 99.61%        | 609             | 188,168                 | 0.71%                 | 411              | 0.61%                |
| 16               | 87,697                   | 99.71%        | 596             | 198,059                 | 4.69%                 | 455              | 0.63%                |
| 17               | 78,865                   | 99.65%        | 569             | 209,363                 | 3.06%                 | 380              | 0.61%                |
| 18               | 74,575                   | 99.68%        | 568             | 215,577                 | 2.44%                 | 95               | 0.15%                |
| 19               | 70,975                   | 99.78%        | 345             | 283,264                 | 2.17%                 | 149              | 0.26%                |
| 20               | 61,413                   | 99.65%        | 425             | 207,556                 | 3.53%                 | 165              | 0.33%                |
| 21               | 44,142                   | 99.49%        | 257             | 178,353                 | 4.29%                 | 545              | 1.60%                |
| 22               | 38,604                   | 99.71%        | 249             | 221,143                 | 1.29%                 | 87               | 0.28%                |
| <b>Autosomes</b> | <b>2,779,801</b>         | <b>99.64%</b> | <b>19,215</b>   | <b>206,063</b>          | <b>1.91%</b>          | <b>8,497</b>     | <b>0.37%</b>         |

**Supplementary Table 3. WhatsHap phasing performance on DeepVariant (CCS) callset.** WhatsHap provides highly complete phasing (99.64%) of heterozygous variants in the DeepVariant (CCS) callset that is concordant with the Genome in a Bottle Trio/10X Genomics phasing truth set. Statistics are reported by WhatsHap with Hamming and switch error rates evaluated against the truth set.

Supplementary Table 4

| Platform     | Caller               | All variants  |               |               | Deletions     |               |               | Insertions    |               |               |
|--------------|----------------------|---------------|---------------|---------------|---------------|---------------|---------------|---------------|---------------|---------------|
|              |                      | Precision     | Recall        | F1 ^          | Precision     | Recall        | F1            | Precision     | Recall        | F1            |
| PacBio (CCS) | integrated           | 96.13%        | <b>95.99%</b> | <b>96.06%</b> | <b>97.66%</b> | <b>96.88%</b> | <b>97.27%</b> | 94.97%        | <b>95.30%</b> | 95.13%        |
| PacBio (CCS) | pbsv                 | <b>96.26%</b> | 94.93%        | 95.59%        | 96.71%        | 94.98%        | 95.84%        | <b>95.95%</b> | 94.89%        | <b>95.42%</b> |
| PacBio (CCS) | Sniffles             | 94.28%        | 91.76%        | 93.01%        | 96.56%        | 92.19%        | 94.32%        | 92.59%        | 91.44%        | 92.01%        |
| PacBio (CCS) | paftools (Canu †‡)   | 93.16%        | 92.32%        | 92.74%        | 95.84%        | 92.76%        | 94.28%        | 91.48%        | 91.99%        | 91.73%        |
| PacBio (CCS) | paftools (FALCON †)  | 93.25%        | 89.14%        | 91.15%        | 95.99%        | 89.00%        | 92.36%        | 91.64%        | 89.25%        | 90.43%        |
| Illumina     | Manta                | 85.34%        | 55.88%        | 67.53%        | 85.95%        | 76.90%        | 81.17%        | 92.12%        | 39.65%        | 55.44%        |
| 10X          | paftools (Supernova) | 64.52%        | 52.74%        | 58.04%        | 55.37%        | 73.71%        | 63.24%        | 82.74%        | 36.57%        | 50.72%        |
| 10X          | LongRanger           | 83.79%        | 39.83%        | 53.99%        | 94.66%        | 70.18%        | 80.60%        | 59.39%        | 16.41%        | 25.71%        |
| Illumina     | Delly                | 65.92%        | 19.90%        | 30.58%        | 65.92%        | 45.70%        | 53.98%        | 0.00%         | 0.00%         | 0.00%         |

**Supplementary Table 4. Structural variant calling performance** as measured with Truvari against the GIAB HG002 SV benchmark. **Bold** indicates the highest value in each column; callers are sorted (“^”) based on F1 for all variants. † union of maternal and paternal assemblies; ‡ polished with arrow.

Supplementary Table 5

| Haplotype | Assembler | CPU core hours |          |                 |
|-----------|-----------|----------------|----------|-----------------|
|           |           | Trio binning   | Assembly | Arrow polishing |
| Mixed     | Canu      | n/a            | 2,136    | -               |
| Mixed     | FALCON    | n/a            | 2,650    | -               |
| Mixed     | wtdbg2    | n/a            | 380      | -               |
| Maternal  | Canu      | 350            | 751      | 71,226*         |
| Maternal  | FALCON    | 350            | 1,683    | 26,137          |
| Maternal  | wtdbg2    | 350            | 182      | -               |
| Paternal  | Canu      | 350            | 841      | 70,069*         |
| Paternal  | FALCON    | 350            | 1,568    | 26,183          |
| Paternal  | wtdbg2    | 350            | 187      | -               |

**Supplementary Table 5. CPU core hours for *de novo* assembly and polishing.**

The CPU core hours required for trio binning, assembly, and polishing were recorded using the Unix `time` command. Assembly time includes read correction built into the assembler but excludes the total upfront CCS read generation (118,365 CPU core hours). The assemblers were run by different groups on different hardware, and thus times are not directly comparable. “\*” Arrow polishing was run for one round on FALCON and two rounds on Canu; “n/a” = not applicable; “-” = not done

Supplementary Table 6

| k-mer (bp) | % reads assigned to haplotype |          |            |
|------------|-------------------------------|----------|------------|
|            | Maternal                      | Paternal | Unassigned |
| 21         | 35.3%                         | 33.6%    | 31.1%      |
| 51         | 40.4%                         | 38.1%    | 21.5%      |
| 91         | 40.5%                         | 38.7%    | 20.8%      |

**Supplementary Table 6. CCS read classification by trio binning.** The percentage of CCS reads assigned to the maternal and paternal haplotype by k-mer size used in trio binning. CCS reads with an insufficient number of distinguishing k-mers are assigned to the “unassigned” haplotype, which includes reads from homozygous regions of genome.

Supplementary Table 7

| NCBI/ENA Accession | Platform       | Sample           | Assembler | Polish                         | Concordance ^ (Phred) |
|--------------------|----------------|------------------|-----------|--------------------------------|-----------------------|
| -                  | PacBio (CCS)   | HG002 (paternal) | Canu      | Arrow                          | 99.9983% (Q47.7)      |
| -                  | PacBio (CCS)   | HG002 (maternal) | Canu      | Arrow                          | 99.9981% (Q47.2)      |
| -                  | PacBio (CCS)   | HG002            | wtdbg2    | -                              | 99.9965% (Q44.6)      |
| GCA_001542345      | PacBio (CLR)   | HG002            | PBcR      | Quiver                         | 99.9899% (Q40.0)      |
| GCA_002077035      | PacBio (CLR)   | HG001            | FALCON    | Quiver                         | 99.9893% (Q39.7)      |
| ERZ781176          | ONT + Illumina | HG001            | Canu      | Nanopolish×2, Pilon×2, Racon×2 | 99.8693% (Q28.8)      |
| -                  | ONT            | HG001            | Canu      | Nanopolish×2                   | 99.6565% (Q24.6)      |

**Supplementary Table 7. Reference concordance of assemblies from different platforms.** Concordance is measured at non-variant positions in Genome in a Bottle high-confidence regions. The three CCS read assemblies have higher concordance than accessioned assemblies provided with PacBio continuous long reads (CLR) or Oxford Nanopore read (ONT). ONT HG001 assembly is from [https://obj.umiacs.umd.edu/marbl\\_publications/triobinning/albacore\\_canu\\_nanopolish2.fasta](https://obj.umiacs.umd.edu/marbl_publications/triobinning/albacore_canu_nanopolish2.fasta).

Supplementary Table 8

| Haplotype | Assembler | Segdups       |                 |
|-----------|-----------|---------------|-----------------|
|           |           | Resolved (Mb) | Unresolved (Mb) |
| Mixed     | Canu      | 63.6          | 111.8           |
| Mixed     | FALCON    | 46.1          | 129.3           |
| Mixed     | wtdbg2    | 26.4          | 149.0           |
| Maternal  | Canu      | 60.2          | 115.2           |
| Maternal  | FALCON    | 43.2          | 132.2           |
| Maternal  | wtdbg2    | 28.9          | 146.5           |
| Paternal  | Canu      | 60.0          | 115.4           |
| Paternal  | FALCON    | 41.7          | 133.7           |
| Paternal  | wtdbg2    | 27.2          | 148.2           |

**Supplementary Table 8. Resolution of segmental duplications.** A segmental duplication in GRCh38 is considered resolved by an assembly if it is spanned by a contig with at least 50 kb on each flank, as measured by segDupPlots (<https://github.com/mvollger/segDupPlots>).

Supplementary Table 9

| Discrepancy | Variant Type | Repeat family (if ≥1 kb) | Homopolymer Length (bp) (if ≥6 bp) | Correct Call | Chr | Position    | Variant                      |
|-------------|--------------|--------------------------|------------------------------------|--------------|-----|-------------|------------------------------|
| AM          | INDEL        |                          | 19                                 | GIAB         | 2   | 9,591,845   | CT/C                         |
| AM          | INDEL        |                          |                                    | GIAB         | 2   | 232,051,483 | GCA/GCATCATGGAGAATGGGACATCTC |
| AM          | INDEL        |                          |                                    | GIAB         | 3   | 37,083,407  | G/GA                         |
| AM          | INDEL        |                          |                                    | CCS          | 4   | 11,468,804  | CACACATATAT/C                |
| AM          | INDEL        | L1PA2                    |                                    | CCS          | 5   | 42,740,225  | CT/C                         |
| AM          | INDEL        |                          | Nearby 17                          | GIAB         | 6   | 41,984,320  | ACTAT/A                      |
| AM          | INDEL        |                          | 16                                 | GIAB         | 8   | 73,675,279  | TAAAA/T                      |
| AM          | INDEL        |                          | 13                                 | GIAB         | 13  | 76,646,445  | G/GA                         |
| AM          | INDEL        |                          | 16                                 | GIAB         | 15  | 44,350,983  | C/CA                         |
| AM          | INDEL        |                          | 13                                 | GIAB         | 19  | 1,586,670   | A/ATTT                       |
| AM          | SNP          | HERVH-int                |                                    | CCS          | 2   | 5,143,996   | G/A                          |
| AM          | SNP          |                          |                                    | GIAB         | 2   | 230,174,543 | A/G                          |
| AM          | SNP          | L1PA2                    |                                    | CCS          | 4   | 165,276,021 | T/C                          |
| AM          | SNP          |                          | 8                                  | GIAB         | 5   | 16,287,108  | A/C                          |
| AM          | SNP          |                          | 8                                  | GIAB         | 11  | 41,384,344  | C/T                          |
| AM          | SNP          |                          | 20                                 | GIAB         | 12  | 51,793,781  | A/C                          |
| AM          | SNP          |                          | 9                                  | GIAB         | 13  | 34,840,815  | G/T                          |
| AM          | SNP          | L1PA3                    |                                    | CCS          | 13  | 48,291,499  | A/C                          |
| AM          | SNP          |                          | 12                                 | GIAB         | 13  | 71,512,745  | A/T                          |
| AM          | SNP          |                          |                                    | GIAB         | 21  | 25,668,597  | G/A                          |
| FN          | INDEL        |                          |                                    | GIAB         | 1   | 162,491,859 | A/ATGTCTAG                   |
| FN          | INDEL        |                          | 12                                 | GIAB         | 2   | 152,262,374 | G/GTT                        |
| FN          | INDEL        |                          | 14                                 | GIAB         | 2   | 236,062,930 | G/GTT                        |
| FN          | INDEL        | L1PA2                    | 9                                  | GIAB         | 3   | 107,982,543 | AT/A                         |
| FN          | INDEL        |                          | 18                                 | GIAB         | 4   | 149,672,221 | A/ATT                        |
| FN          | INDEL        |                          |                                    | CCS          | 8   | 5,930,728   | TACAC/T                      |
| FN          | INDEL        |                          | 6                                  | GIAB         | 10  | 29,087,199  | T/TCC                        |
| FN          | INDEL        |                          |                                    | GIAB         | 15  | 26,120,981  | C/CTTACACTGGGCTTTTTGTAAGGA   |
| FN          | INDEL        |                          |                                    | CCS          | 15  | 41,943,823  | T/TCCTCTTCTCTCCTCTCC         |
| FN          | INDEL        |                          | 15                                 | GIAB         | 17  | 5,198,683   | C/CA                         |
| FN          | SNP          |                          | 16                                 | GIAB         | 5   | 55,201,041  | A/G                          |
| FN          | SNP          |                          |                                    | GIAB         | 6   | 8,353,625   | C/T                          |
| FN          | SNP          |                          |                                    | CCS          | 6   | 9,737,425   | T/C                          |
| FN          | SNP          |                          |                                    | GIAB         | 6   | 57,283,620  | T/C                          |
| FN          | SNP          |                          | 13                                 | GIAB         | 7   | 135,981,582 | T/A                          |
| FN          | SNP          |                          |                                    | CCS          | 7   | 157,385,671 | A/G                          |
| FN          | SNP          |                          |                                    | GIAB         | 9   | 117,917,190 | A/C                          |
| FN          | SNP          |                          | 13                                 | GIAB         | 9   | 129,471,234 | T/A                          |
| FN          | SNP          |                          | 5                                  | CCS          | 17  | 32,064,214  | A/G                          |
| FN          | SNP          |                          | 25                                 | GIAB         | 17  | 68,021,050  | T/A                          |
| FP          | INDEL        | L1PA2                    |                                    | CCS          | 1   | 94,256,825  | A/AAC                        |
| FP          | INDEL        | L1HS                     |                                    | CCS          | 2   | 153,864,971 | AT/A                         |
| FP          | INDEL        | L1M2                     | 13                                 | GIAB         | 3   | 97,014,398  | AT/A                         |
| FP          | INDEL        | L1HS                     | 7                                  | CCS          | 4   | 112,819,087 | GA/G                         |
| FP          | INDEL        | L1PA2                    |                                    | CCS          | 4   | 165,026,074 | A/AG                         |
| FP          | INDEL        |                          | 10                                 | GIAB         | 6   | 64,897,720  | A/AT                         |
| FP          | INDEL        |                          | 15                                 | GIAB         | 7   | 38,338,238  | C/CA                         |
| FP          | INDEL        |                          |                                    | GIAB         | 8   | 132,575,025 | C/CAAAAAAAAA                 |
| FP          | INDEL        | L1P1                     |                                    | CCS          | 11  | 23,338,682  | C/CT                         |
| FP          | INDEL        |                          | 20                                 | GIAB         | 11  | 61,993,476  | CA/C                         |
| FP          | SNP          | L1HS                     |                                    | CCS          | 1   | 35,034,071  | T/C                          |
| FP          | SNP          | L1HS                     |                                    | CCS          | 3   | 79,181,734  | C/T                          |
| FP          | SNP          |                          | Nearby 8                           | GIAB         | 4   | 55,520,593  | G/A                          |
| FP          | SNP          | L1HS                     | 7                                  | CCS          | 4   | 94,532,444  | T/G                          |
| FP          | SNP          | ALR/Alpha                |                                    | CCS          | 8   | 46,873,565  | C/T                          |
| FP          | SNP          |                          | 11                                 | GIAB         | 9   | 6,900,971   | C/T                          |
| FP          | SNP          | L1PA2                    |                                    | CCS          | 9   | 22,350,168  | A/C                          |
| FP          | SNP          |                          | 13                                 | GIAB         | 20  | 1,347,896   | A/G                          |
| FP          | SNP          |                          | 12                                 | GIAB         | 20  | 4,159,335   | C/T                          |
| FP          | SNP          | L1PA2                    |                                    | CCS          | 21  | 42,288,851  | C/A                          |

**Supplementary Table 9. Manual curation of small variant discrepancies between CCS callset and Genome in a Bottle benchmark.** For the “Discrepancy” column, “AM” means genotype difference, “FN” means false negative (in benchmark but not callset), and “FP” means false positive (in callset but not benchmark). “Repeat family” column is from the RepeatMasker track from the UCSC Genome Browser. “Correct Call” column is “GIAB” when the benchmark was deemed correct by expert curators, and “CCS” when the CCS callset was deemed correct. Rows where the correct call is from the CCS callset are colored blue.



Supplementary Table 10

| Discrepancy | SV Type | SV Length (bp) | Simple Repeat Length (bp) (if ≥100 bp) | Simple Repeat Period (bp) | Correct Call | Chr | Position    |
|-------------|---------|----------------|----------------------------------------|---------------------------|--------------|-----|-------------|
| FN          | DEL     | -32,196        |                                        |                           | GIAB         | 1   | 152,555,543 |
| FN          | DEL     | -2,269         |                                        |                           | GIAB         | 2   | 159,958,799 |
| FN          | DEL     | -49,058        | 172                                    | 71                        | -            | 4   | 34,779,881  |
| FN          | DEL     | -127           | 466                                    | 127                       | GIAB         | 4   | 123,733,539 |
| FN          | DEL     | -357           | 1,921                                  | 20                        | GIAB         | 13  | 30,131,788  |
| FN          | DEL     | -108           | 589                                    | 54                        | GIAB         | 13  | 114,841,327 |
| FN          | DEL     | -52            |                                        |                           | GIAB         | 16  | 85,800,468  |
| FN          | DEL     | -565           | 1,403                                  | 561                       | -            | 19  | 4,884,873   |
| FN          | DEL     | -55            |                                        |                           | GIAB         | 19  | 57,683,315  |
| FN          | DEL     | -120           | 917                                    | 40                        | GIAB         | 20  | 62,510,913  |
| FN          | INS     | 62             |                                        |                           | GIAB         | 2   | 228,113,946 |
| FN          | INS     | 104            | 163                                    | 27                        | GIAB         | 3   | 66,992,107  |
| FN          | INS     | 52             |                                        |                           | GIAB         | 3   | 172,678,665 |
| FN          | INS     | 125            | 230                                    | 23                        | GIAB         | 5   | 105,107,607 |
| FN          | INS     | 727            | 651                                    | 65                        | -            | 6   | 40,459,830  |
| FN          | INS     | 172            | 815                                    | 4                         | -            | 9   | 135,394,538 |
| FN          | INS     | 6,179          |                                        |                           | GIAB         | 12  | 71,053,961  |
| FN          | INS     | 51             | 125                                    | 3                         | GIAB         | 13  | 29,161,602  |
| FN          | INS     | 3,268          |                                        |                           | GIAB         | 14  | 67,862,850  |
| FN          | INS     | 58             | 472                                    | 33                        | CCS          | 19  | 14,488,489  |
| FP          | DEL     | -1,432         |                                        |                           | -            | 1   | 108,735,819 |
| FP          | DEL     | -50            |                                        |                           | CCS          | 2   | 65939,406   |
| FP          | DEL     | -80            | 1,274                                  | 16                        | CCS          | 6   | 167,162,349 |
| FP          | DEL     | -80            | 332                                    | 40                        | CCS          | 7   | 129,149     |
| FP          | DEL     | -65            | 632                                    | 168                       | -            | 10  | 134,253,963 |
| FP          | DEL     | -83            | 333                                    | 83                        | CCS          | 11  | 1,431,223   |
| FP          | DEL     | -74            | 1,674                                  | 74                        | CCS          | 12  | 6,038,958   |
| FP          | DEL     | -128           |                                        |                           | -            | 13  | 107,435,844 |
| FP          | DEL     | -63            | 1,227                                  | 22                        | GIAB         | 17  | 230,498     |
| FP          | DEL     | -300           | 1,923                                  | 60                        | GIAB         | 18  | 77,569,248  |
| FP          | INS     | 103            |                                        |                           | CCS          | 4   | 141,283,453 |
| FP          | INS     | 52             | 588                                    | 26                        | CCS          | 4   | 190,329,327 |
| FP          | INS     | 202            | 893                                    | 18                        | -            | 8   | 146,172,196 |
| FP          | INS     | 176            | 1,184                                  | 24                        | -            | 10  | 132,840,681 |
| FP          | INS     | 783            | 1,184                                  | 24                        | -            | 10  | 132,841,387 |
| FP          | INS     | 328            |                                        |                           | CCS          | 13  | 112,993,782 |
| FP          | INS     | 60             | 312                                    | 4                         | CCS          | 16  | 85,867,748  |
| FP          | INS     | 54             | 527                                    | 18                        | -            | 17  | 10,662,861  |
| FP          | INS     | 84             |                                        |                           | CCS          | 18  | 53,029,667  |
| FP          | INS     | 267            | 641                                    | 37                        | CCS          | X   | 67,035,046  |

**Supplementary Table 10. Manual curation of structural variant discrepancies between CCS callset and Genome in a Bottle benchmark.** For the “Discrepancy” column, “FN” means false negative (in benchmark but not callset), and “FP” means false positive (in callset but not benchmark). “Simple Repeat Length” and “Simple Repeat Period” are from the simpleRepeat track from the UCSC Genome Browser. “Correct Call” column is “GIAB” when the benchmark was deemed correct by expert curators, “CCS” when the CCS callset was deemed correct, and “-” when it is unclear which callset is correct (typically due to complex tandem repeats that permit multiple representations of the same variant). Rows where the correct call is from the CCS callset are colored blue.

## Supplementary References

1. Ambardar, S. & Gowda, M. High-Resolution Full-Length HLA Typing Method Using Third Generation (Pac-Bio SMRT) Sequencing Technology. *Methods Mol. Biol. Clifton NJ* **1802**, 135–153 (2018).
2. McInnes, L., Healy, J. & Melville, J. UMAP: Uniform Manifold Approximation and Projection for Dimension Reduction. *ArXiv180203426 Cs Stat* (2018).
3. Myers, S., Freeman, C., Auton, A., Donnelly, P. & McVean, G. A common sequence motif associated with recombination hot spots and genome instability in humans. *Nat. Genet.* **40**, 1124–1129 (2008).
